# Supplementary material for: Prognostic Effect of a Tumor Invasion Pattern Mimicking Crawling Between Muscle Fibers in Oral Tongue Carcinoma
Source: Research Square preprint supplement (doi:10.21203/rs.3.rs-7604116/v1), 2025-10-08

**Supplementary Information**

**Prognostic Effect of a Tumor Invasion Pattern Mimicking Crawling Between Muscle Fibers in Oral Tongue Carcinoma**

Daisuke Baba, M.D.1,2,3, Naoya Sakamoto, M.D., Ph.D.4, Motohiro Kojima, M.D., Ph.D.5, Masashi Wakabayashi, M.Sc.6, Tetsuya Nakatsura, M.D., Ph.D.1, Ryuichi Hayashi, M.D. , Ph.D.7, Genichiro Ishii, M.D., Ph.D.3,8, Shingo Sakashita, M.D., Ph.D.4*

**Supplementary Figures**

**Supplemental Figure 1.** WPOI classification.


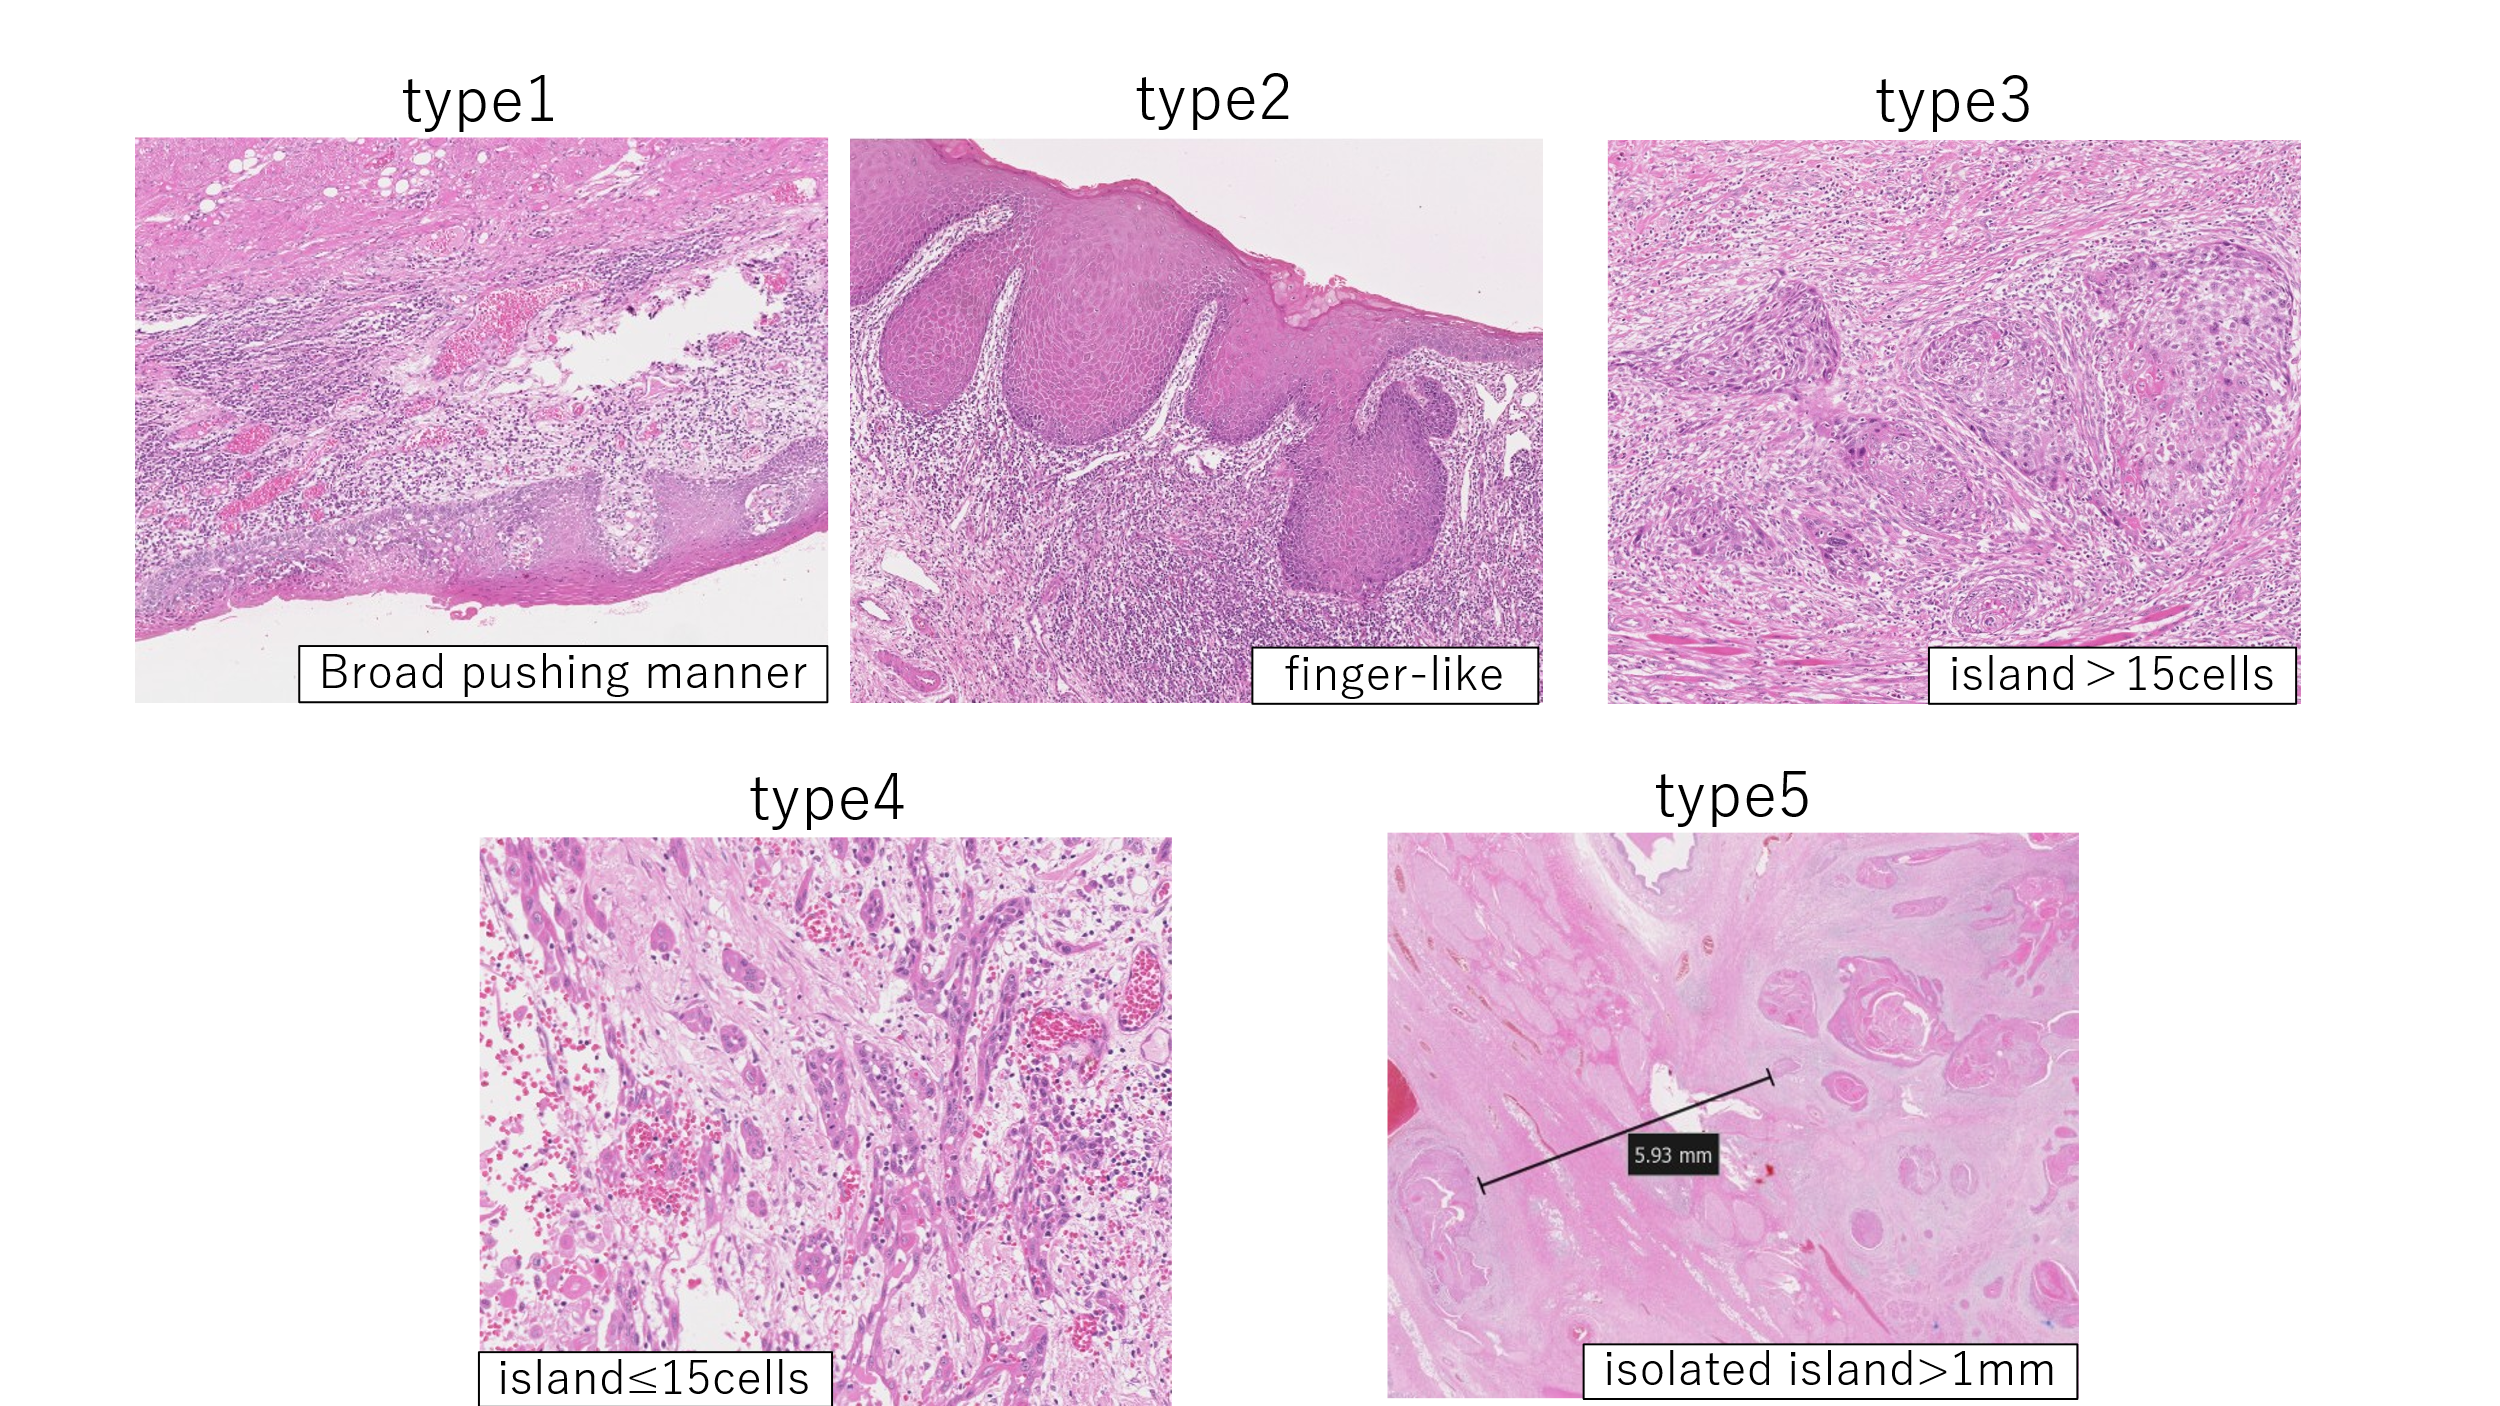


WPOI, worst pattern of invasion.

**Supplemental Figure 2.** The conceptual figures of BABA.


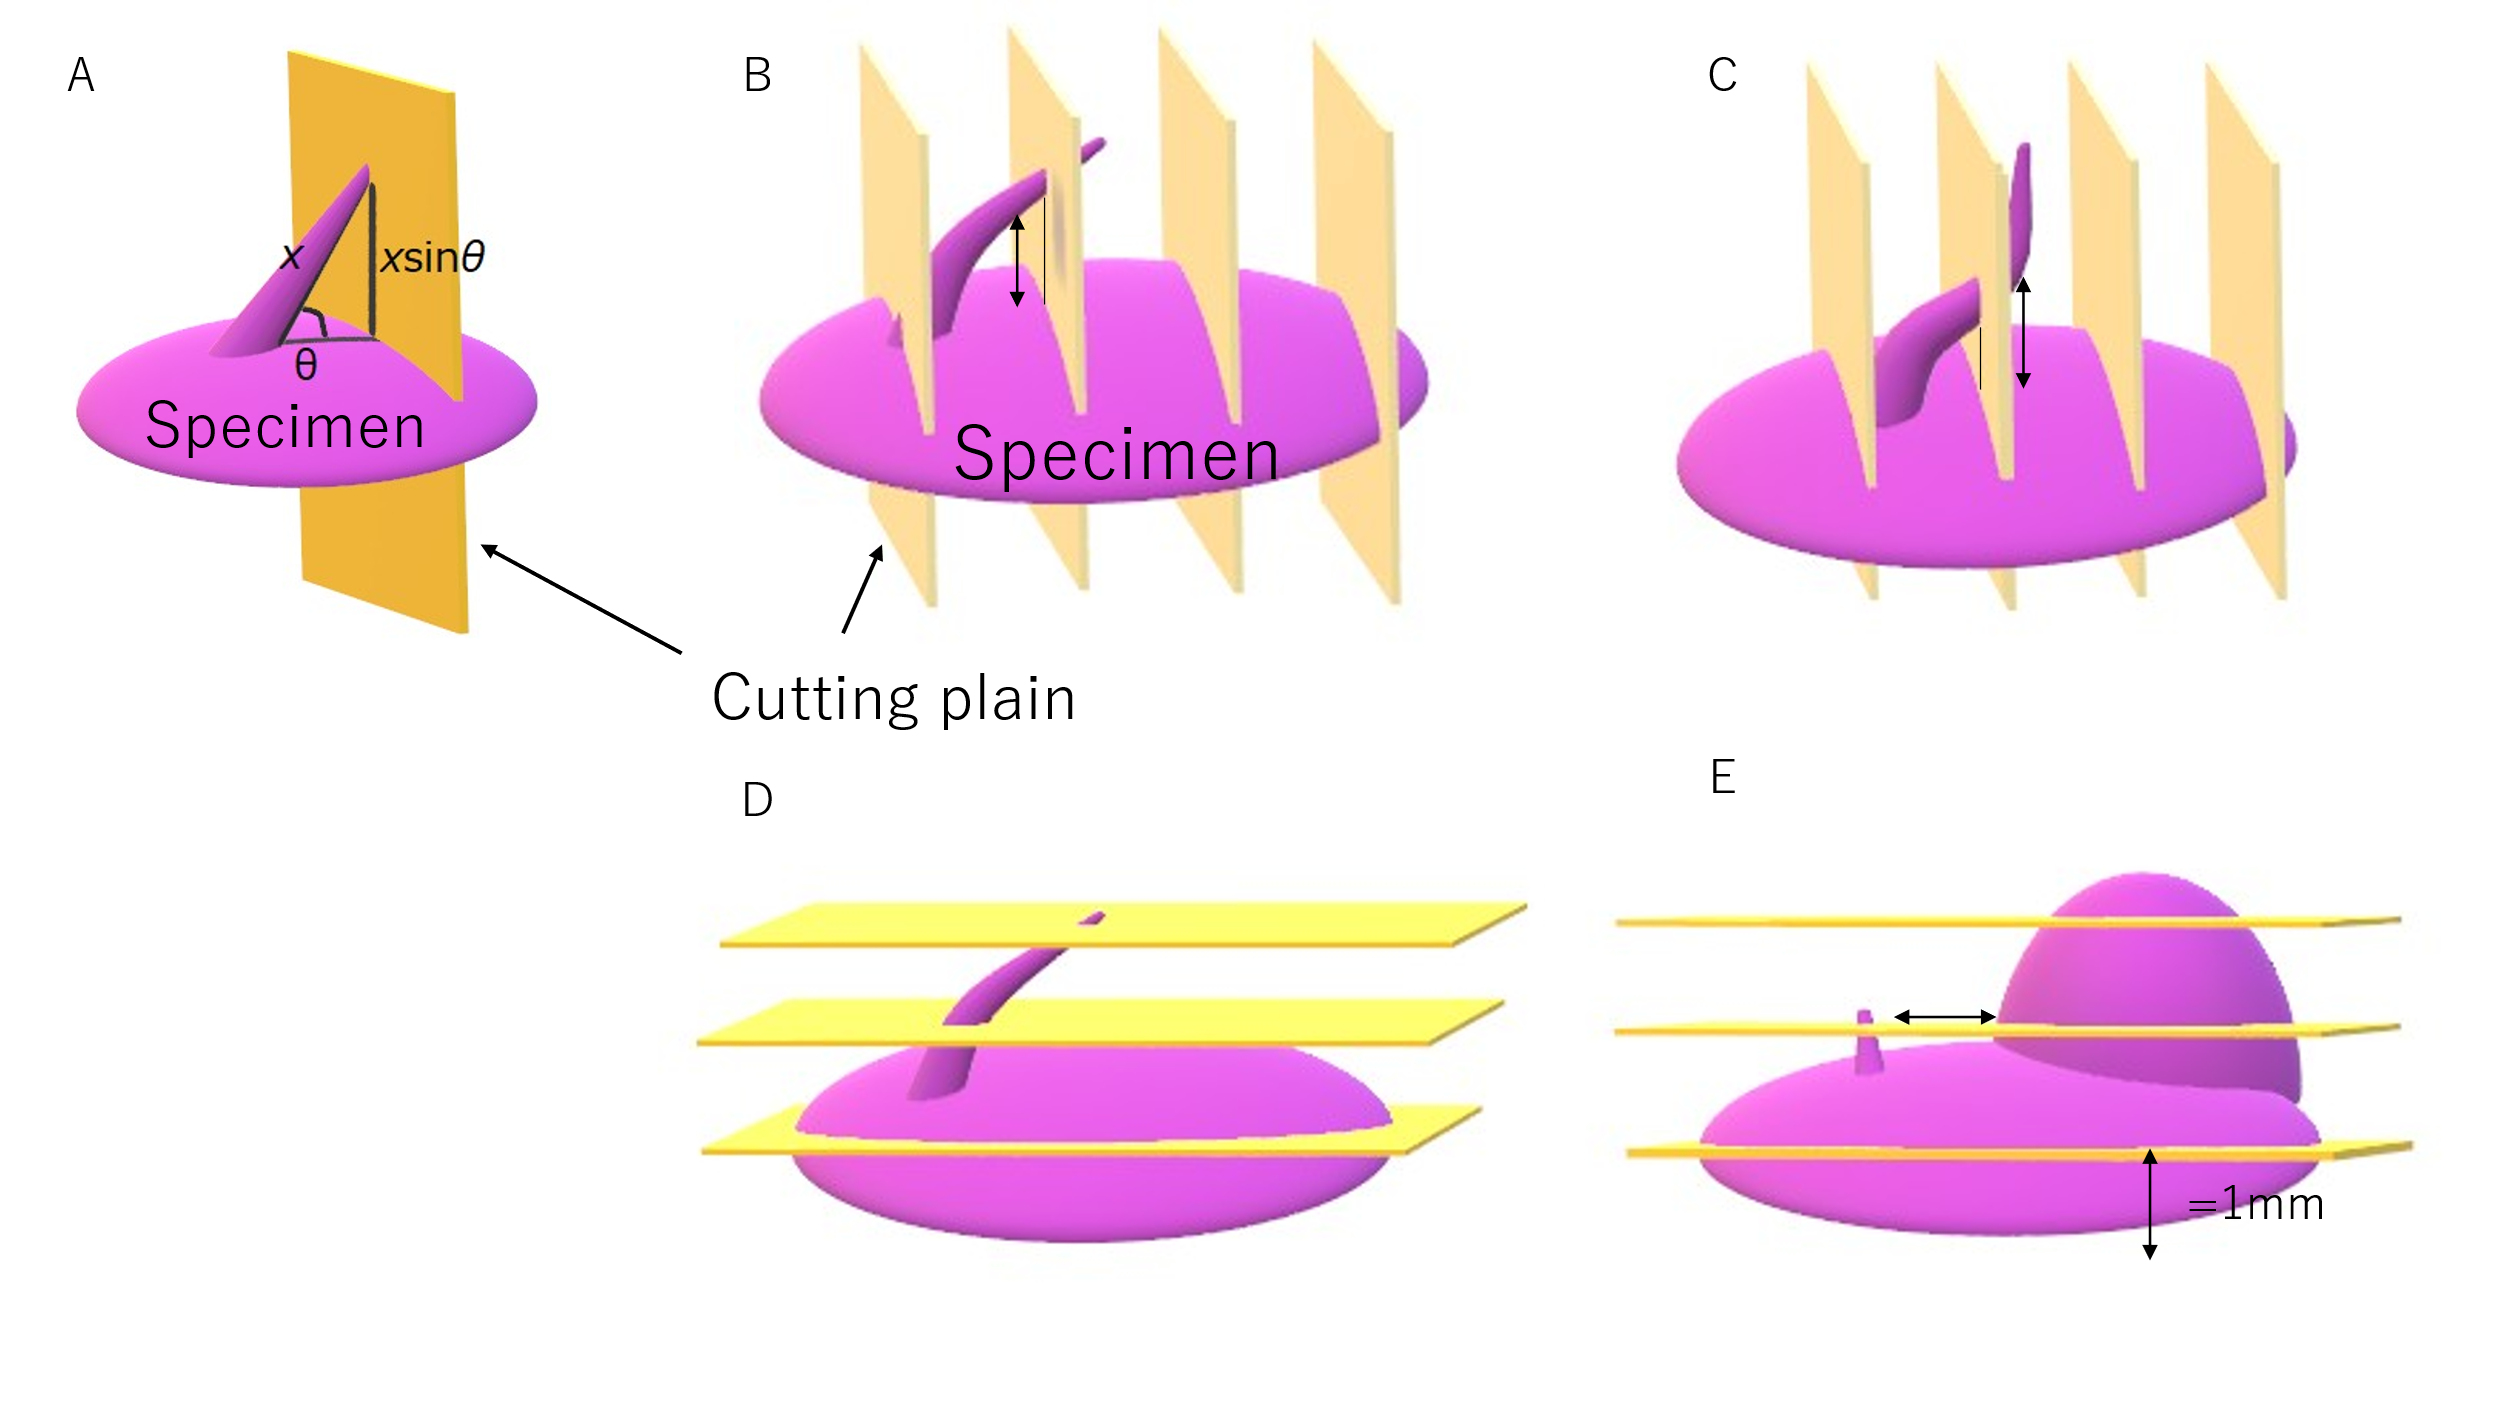


BABA, Broadening Amoeboid Behavior of Advancing tumor cells.

**Supplemental Figure 3.** Patient selection flow chart.


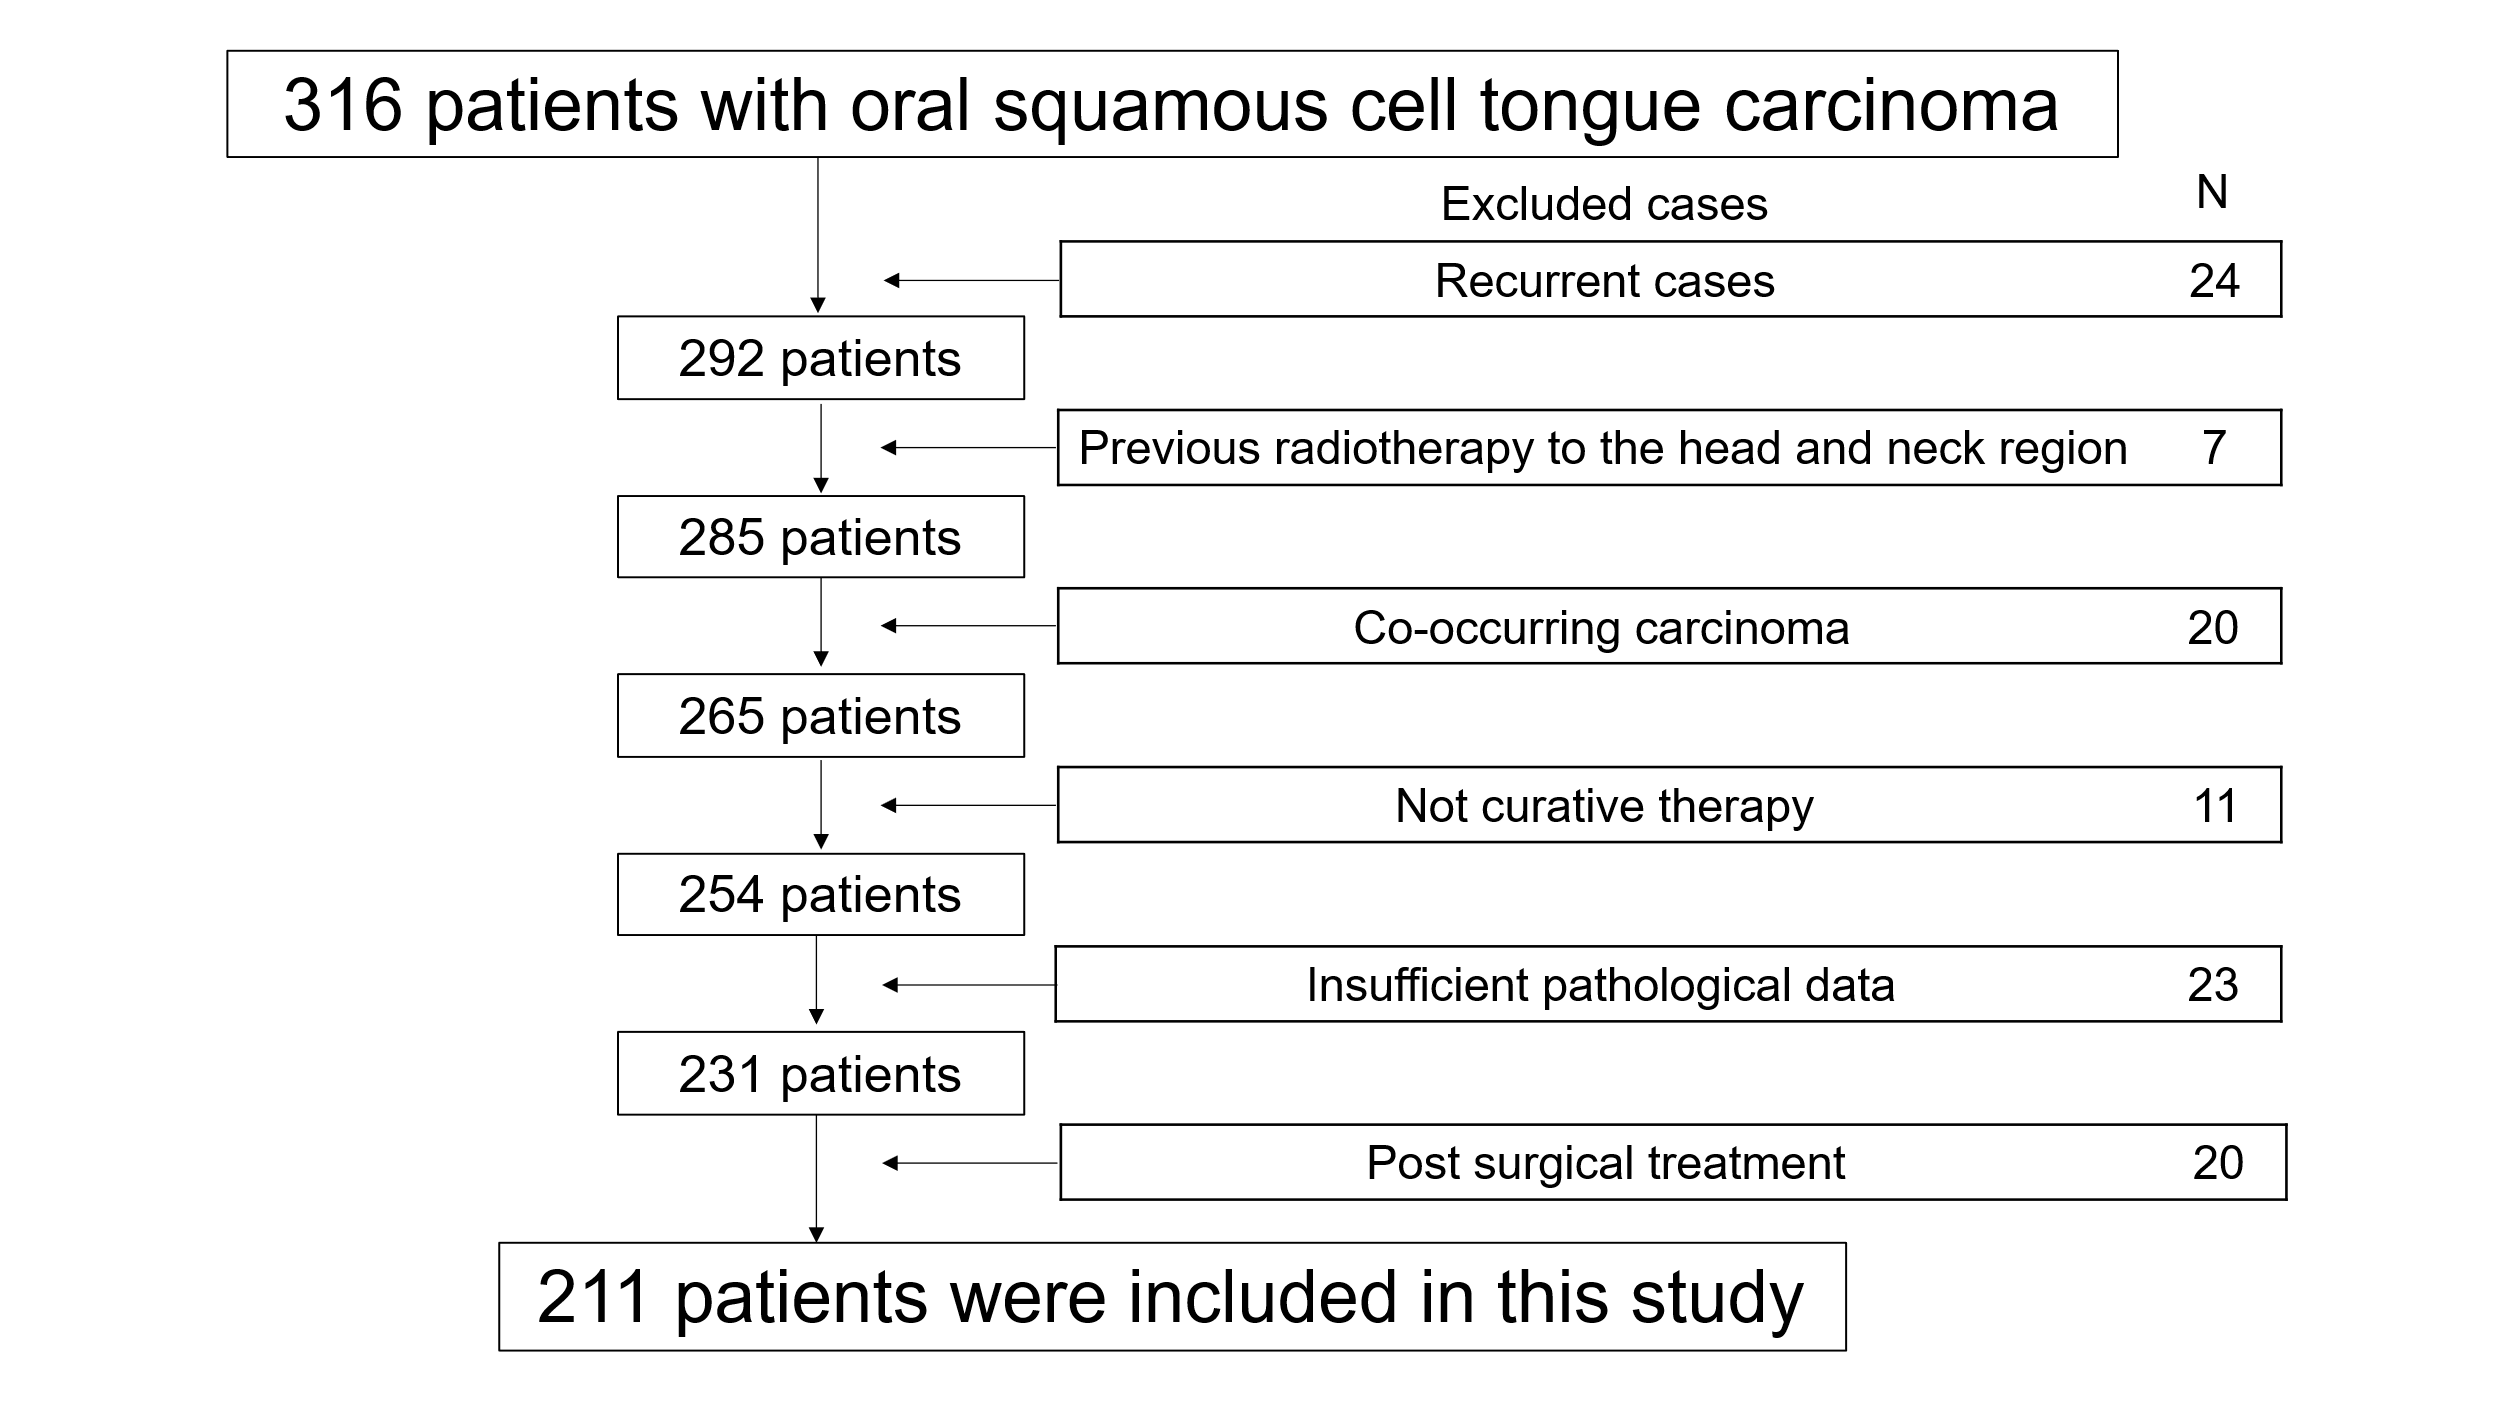

Supplement: Supplementary file 1 [file 1b8cc088ecf330ed28643c65.docx]
